# Supplementary material
Source: MDPI journal article supplement (https://www.mdpi.com/2813-9844/6/2/27)
Supplement: s1 [file s1]

## Supplementary Materials

**Table S1.** Significant partial correlations (*r*) with adjusted *p*-values less than 0.05.

| Node 1                    | Node 2                    | Partial <i>r</i> | Adjusted <i>p</i> -value |
|---------------------------|---------------------------|------------------|--------------------------|
| Loss of interest          | Feelings of sadness       | 0.999            | .000                     |
| IL-6                      | CRP                       | 0.718            | .000                     |
| Feelings of sadness       | Feelings of worthlessness | 0.635            | .000                     |
| Sleep disturbance         | Fatigue                   | 0.481            | .000                     |
| Fatigue                   | Appetite changes          | 0.421            | .000                     |
| Feelings of worthlessness | Concentration difficulty  | 0.380            | .000                     |
| Concentration difficulty  | Psychomotor problems      | 0.324            | .000                     |
| Loss of interest          | Fatigue                   | 0.405            | .000                     |
| Feelings of worthlessness | Suicidal ideation         | 0.277            | .000                     |
| Loss of interest          | Concentration difficulty  | 0.306            | .000                     |
| Appetite changes          | Psychomotor problems      | 0.230            | .000                     |
| IL-6                      | Age                       | 0.187            | .000                     |
| IL-6                      | TNF- $\alpha$             | 0.180            | .000                     |
| BMI                       | Age                       | -0.159           | .000                     |
| Feelings of sadness       | Psychomotor problems      | 0.250            | .000                     |
| IL-6                      | BMI                       | 0.156            | .000                     |
| Age                       | Feelings of worthlessness | -0.172           | .001                     |
| Feelings of sadness       | Sleep disturbance         | 0.231            | .001                     |
| Age                       | Appetite changes          | -0.151           | .001                     |
| Feelings of sadness       | Suicidal ideation         | 0.204            | .002                     |
| Sleep disturbance         | Appetite changes          | 0.171            | .002                     |
| Appetite changes          | Feelings of worthlessness | 0.183            | .002                     |
| Sleep disturbance         | Feelings of worthlessness | 0.180            | .003                     |
| Psychomotor problems      | Suicidal ideation         | 0.139            | .005                     |
| Fatigue                   | Psychomotor problems      | 0.158            | .009                     |
| BMI                       | Fatigue                   | 0.133            | .009                     |
| Appetite changes          | Concentration difficulty  | 0.144            | .012                     |
| Feelings of sadness       | Fatigue                   | 0.197            | .012                     |
| Loss of interest          | Suicidal ideation         | 0.160            | .012                     |
| MCP-1                     | Sleep disturbance         | 0.107            | .022                     |
| Loss of interest          | Appetite changes          | 0.157            | .026                     |
| MCP-1                     | Psychomotor problems      | 0.099            | .031                     |
| Concentration difficulty  | Suicidal ideation         | 0.112            | .038                     |
| Sleep disturbance         | Psychomotor problems      | 0.117            | .038                     |
| TNF- $\alpha$             | BMI                       | -0.081           | .042                     |

Table S2. NemoCollection results.

| CR |                                                                                         |
|----|-----------------------------------------------------------------------------------------|
| CR | [psychomotor problems, suicidal ideation, loss of interest, Feelings of sadness]        |
| CR | [psychomotor problems, suicidal ideation, loss of interest, MCP-1]                      |
| CR | [psychomotor problems, suicidal ideation, loss of interest, sleep disturbance]          |
| CR | [psychomotor problems, suicidal ideation, fatigue, BMI]                                 |
| CR | [psychomotor problems, suicidal ideation, fatigue, feelings of worthlessness]           |
| CR | [psychomotor problems, suicidal ideation, appetite changes, age]                        |
| CR | [psychomotor problems, suicidal ideation, feelings of worthlessness, MCP-1]             |
| CR | [psychomotor problems, suicidal ideation, feelings of worthlessness, age]               |
| CR | [psychomotor problems, fatigue, loss of interest, Feelings of sadness]                  |
| CR | [psychomotor problems, fatigue, loss of interest, MCP-1]                                |
| CR | [psychomotor problems, fatigue, BMI, concentration difficulty]                          |
| CR | [psychomotor problems, fatigue, BMI, IL-6]                                              |
| CR | [psychomotor problems, fatigue, BMI, MCP-1]                                             |
| CR | [psychomotor problems, fatigue, BMI, age]                                               |
| CR | [psychomotor problems, fatigue, BMI, TNF- $\alpha$ ]                                    |
| CR | [psychomotor problems, fatigue, concentration difficulty, feelings of worthlessness]    |
| CR | [psychomotor problems, appetite changes, loss of interest, Feelings of sadness]         |
| CR | [psychomotor problems, appetite changes, loss of interest, MCP-1]                       |
| CR | [psychomotor problems, appetite changes, feelings of worthlessness, MCP-1]              |
| CR | [psychomotor problems, appetite changes, MCP-1, age]                                    |
| CR | [psychomotor problems, appetite changes, age, BMI]                                      |
| CR | [psychomotor problems, appetite changes, age, IL-6]                                     |
| CR | [psychomotor problems, concentration difficulty, loss of interest, Feelings of sadness] |
| CR | [psychomotor problems, concentration difficulty, loss of interest, MCP-1]               |
| CR | [psychomotor problems, concentration difficulty, loss of interest, sleep disturbance]   |
| CR | [psychomotor problems, concentration difficulty, feelings of worthlessness, MCP-1]      |
| CR | [psychomotor problems, concentration difficulty, feelings of worthlessness, age]        |
| CR | [psychomotor problems, sleep disturbance, feelings of worthlessness, age]               |
| CR | [suicidal ideation, loss of interest, Feelings of sadness, feelings of worthlessness]   |
| CR | [suicidal ideation, loss of interest, Feelings of sadness, ]                            |
| CR | [suicidal ideation, loss of interest, fatigue, BMI]                                     |
| CR | [suicidal ideation, loss of interest, fatigue, feelings of worthlessness]               |
| CR | [suicidal ideation, loss of interest, fatigue, sleep disturbance]                       |
| CR | [suicidal ideation, loss of interest, appetite changes, sleep disturbance]              |
| CR | [suicidal ideation, loss of interest, appetite changes, age]                            |
| CR | [suicidal ideation, loss of interest, feelings of worthlessness, sleep disturbance]     |
| CR | [suicidal ideation, loss of interest, feelings of worthlessness, age]                   |
| CR | [suicidal ideation, feelings of worthlessness, appetite changes, fatigue]               |
| CR | [suicidal ideation, feelings of worthlessness, sleep disturbance, fatigue]              |

|    |                                                                                              |
|----|----------------------------------------------------------------------------------------------|
| CR | [suicidal ideation, feelings of worthlessness, sleep disturbance, MCP-1]                     |
| CR | [suicidal ideation, feelings of worthlessness, age, BMI]                                     |
| CR | [suicidal ideation, feelings of worthlessness, age, IL-6]                                    |
| CR | [suicidal ideation, concentration difficulty, appetite changes, fatigue]                     |
| CR | [suicidal ideation, concentration difficulty, appetite changes, sleep disturbance]           |
| CR | [suicidal ideation, concentration difficulty, appetite changes, age]                         |
| CR | [loss of interest, Feelings of sadness, fatigue, BMI]                                        |
| CR | [loss of interest, Feelings of sadness, fatigue, ]                                           |
| CR | [loss of interest, Feelings of sadness, fatigue, sleep disturbance]                          |
| CR | [loss of interest, Feelings of sadness, appetite changes, feelings of worthlessness]         |
| CR | [loss of interest, Feelings of sadness, appetite changes, ]                                  |
| CR | [loss of interest, Feelings of sadness, appetite changes, sleep disturbance]                 |
| CR | [loss of interest, Feelings of sadness, appetite changes, age]                               |
| CR | [loss of interest, Feelings of sadness, concentration difficulty, feelings of worthlessness] |
| CR | [loss of interest, Feelings of sadness, concentration difficulty, ]                          |
| CR | [loss of interest, fatigue, BMI, concentration difficulty]                                   |
| CR | [loss of interest, fatigue, BMI, IL-6]                                                       |
| CR | [loss of interest, fatigue, BMI, age]                                                        |
| CR | [loss of interest, fatigue, BMI, TNF- $\alpha$ ]                                             |
| CR | [loss of interest, fatigue, concentration difficulty, feelings of worthlessness]             |
| CR | [loss of interest, fatigue, concentration difficulty, sleep disturbance]                     |
| CR | [loss of interest, fatigue, sleep disturbance, feelings of worthlessness]                    |
| CR | [loss of interest, fatigue, sleep disturbance, MCP-1]                                        |
| CR | [loss of interest, appetite changes, sleep disturbance, MCP-1]                               |
| CR | [loss of interest, appetite changes, age, BMI]                                               |
| CR | [loss of interest, appetite changes, age, IL-6]                                              |
| CR | [loss of interest, concentration difficulty, feelings of worthlessness, sleep disturbance]   |
| CR | [loss of interest, concentration difficulty, feelings of worthlessness, age]                 |
| CR | [BMI, fatigue, appetite changes, feelings of worthlessness]                                  |
| CR | [BMI, fatigue, appetite changes, concentration difficulty]                                   |
| CR | [BMI, fatigue, appetite changes, IL-6]                                                       |
| CR | [BMI, fatigue, appetite changes, TNF- $\alpha$ ]                                             |
| CR | [BMI, fatigue, IL-6, sleep disturbance]                                                      |
| CR | [BMI, fatigue, IL-6, CRP]                                                                    |
| CR | [BMI, fatigue, sleep disturbance, feelings of worthlessness]                                 |
| CR | [BMI, fatigue, sleep disturbance, MCP-1]                                                     |
| CR | [BMI, fatigue, sleep disturbance, age]                                                       |
| CR | [BMI, fatigue, sleep disturbance, TNF- $\alpha$ ]                                            |
| CR | [BMI, fatigue, age, feelings of worthlessness]                                               |
| CR | [BMI, age, appetite changes, concentration difficulty]                                       |
| CR | [BMI, age, appetite changes, sleep disturbance]                                              |

|    |                                                                                                |
|----|------------------------------------------------------------------------------------------------|
| CR | [BMI, age, appetite changes, TNF- $\alpha$ ]                                                   |
| CR | [BMI, age, feelings of worthlessness, concentration difficulty]                                |
| CR | [BMI, age, feelings of worthlessness, sleep disturbance]                                       |
| CR | [BMI, age, feelings of worthlessness, TNF- $\alpha$ ]                                          |
| CR | [fatigue, appetite changes, age, IL-6]                                                         |
| CR | [fatigue, sleep disturbance, feelings of worthlessness, concentration difficulty]              |
| CR | [fatigue, sleep disturbance, feelings of worthlessness, age]                                   |
| CR | [appetite changes, concentration difficulty, sleep disturbance, MCP-1]                         |
| CR | [appetite changes, concentration difficulty, age, IL-6]                                        |
| CR | [appetite changes, sleep disturbance, MCP-1, age]                                              |
| CR | [appetite changes, sleep disturbance, age, IL-6]                                               |
| CR | [appetite changes, age, IL-6, TNF- $\alpha$ ]                                                  |
| CR | [appetite changes, age, IL-6, CRP]                                                             |
| CR | [feelings of worthlessness, concentration difficulty, sleep disturbance, MCP-1]                |
| CR | [feelings of worthlessness, concentration difficulty, age, IL-6]                               |
| CR | [feelings of worthlessness, sleep disturbance, MCP-1, age]                                     |
| CR | [feelings of worthlessness, sleep disturbance, age, IL-6]                                      |
| CR | [feelings of worthlessness, age, IL-6, TNF- $\alpha$ ]                                         |
| CR | [feelings of worthlessness, age, IL-6, CRP]                                                    |
| Cr |                                                                                                |
| Cr | [psychomotor problems, suicidal ideation, loss of interest, fatigue]                           |
| Cr | [psychomotor problems, suicidal ideation, loss of interest, appetite changes]                  |
| Cr | [psychomotor problems, suicidal ideation, appetite changes, feelings of worthlessness]         |
| Cr | [psychomotor problems, suicidal ideation, feelings of worthlessness, sleep disturbance]        |
| Cr | [psychomotor problems, fatigue, loss of interest, concentration difficulty]                    |
| Cr | [psychomotor problems, concentration difficulty, feelings of worthlessness, sleep disturbance] |
| Cr | [suicidal ideation, loss of interest, appetite changes, feelings of worthlessness]             |
| Cr | [BMI, fatigue, appetite changes, age]                                                          |
| CN |                                                                                                |
| CN | [psychomotor problems, suicidal ideation, fatigue, appetite changes]                           |
| CN | [psychomotor problems, suicidal ideation, fatigue, concentration difficulty]                   |
| CN | [psychomotor problems, suicidal ideation, fatigue, sleep disturbance]                          |
| CN | [psychomotor problems, suicidal ideation, appetite changes, sleep disturbance]                 |
| CN | [psychomotor problems, suicidal ideation, concentration difficulty, MCP-1]                     |
| CN | [psychomotor problems, suicidal ideation, concentration difficulty, sleep disturbance]         |
| CN | [psychomotor problems, suicidal ideation, MCP-1, sleep disturbance]                            |
| CN | [psychomotor problems, fatigue, loss of interest, sleep disturbance]                           |
| CN | [psychomotor problems, fatigue, BMI, appetite changes]                                         |
| CN | [psychomotor problems, fatigue, BMI, sleep disturbance]                                        |
| CN | [psychomotor problems, fatigue, appetite changes, feelings of worthlessness]                   |
| CN | [psychomotor problems, fatigue, appetite changes, MCP-1]                                       |
| CN | [psychomotor problems, fatigue, appetite changes, age]                                         |

|    |                                                                                             |
|----|---------------------------------------------------------------------------------------------|
| CN | [psychomotor problems, fatigue, concentration difficulty, sleep disturbance]                |
| CN | [psychomotor problems, fatigue, sleep disturbance, feelings of worthlessness]               |
| CN | [psychomotor problems, appetite changes, loss of interest, sleep disturbance]               |
| CN | [psychomotor problems, appetite changes, feelings of worthlessness, age]                    |
| CN | [psychomotor problems, appetite changes, concentration difficulty, MCP-1]                   |
| CN | [psychomotor problems, appetite changes, concentration difficulty, age]                     |
| CN | [psychomotor problems, appetite changes, sleep disturbance, age]                            |
| CN | [psychomotor problems, concentration difficulty, MCP-1, sleep disturbance]                  |
| CN | [psychomotor problems, MCP-1, sleep disturbance, feelings of worthlessness]                 |
| CN | [suicidal ideation, loss of interest, Feelings of sadness, concentration difficulty]        |
| CN | [suicidal ideation, loss of interest, fatigue, appetite changes]                            |
| CN | [suicidal ideation, loss of interest, fatigue, concentration difficulty]                    |
| CN | [suicidal ideation, feelings of worthlessness, appetite changes, sleep disturbance]         |
| CN | [suicidal ideation, feelings of worthlessness, appetite changes, age]                       |
| CN | [suicidal ideation, feelings of worthlessness, concentration difficulty, sleep disturbance] |
| CN | [suicidal ideation, feelings of worthlessness, concentration difficulty, age]               |
| CN | [loss of interest, Feelings of sadness, fatigue, appetite changes]                          |
| CN | [loss of interest, Feelings of sadness, appetite changes, concentration difficulty]         |
| CN | [loss of interest, fatigue, BMI, appetite changes]                                          |
| CN | [loss of interest, fatigue, appetite changes, feelings of worthlessness]                    |
| CN | [loss of interest, fatigue, appetite changes, age]                                          |
| CN | [loss of interest, appetite changes, feelings of worthlessness, sleep disturbance]          |
| CN | [loss of interest, appetite changes, feelings of worthlessness, age]                        |
| CN | [loss of interest, appetite changes, concentration difficulty, sleep disturbance]           |
| CN | [loss of interest, appetite changes, concentration difficulty, age]                         |
| CN | [BMI, fatigue, appetite changes, sleep disturbance]                                         |
| CN | [BMI, fatigue, IL-6, age]                                                                   |
| CN | [BMI, fatigue, IL-6, TNF- $\alpha$ ]                                                        |
| CN | [BMI, IL-6, age, appetite changes]                                                          |
| CN | [BMI, IL-6, age, feelings of worthlessness]                                                 |
| CN | [BMI, IL-6, age, CRP]                                                                       |
| CN | [BMI, IL-6, TNF- $\alpha$ , CRP]                                                            |
| CN | [BMI, age, appetite changes, feelings of worthlessness]                                     |
| CN | [fatigue, appetite changes, feelings of worthlessness, concentration difficulty]            |
| CN | [fatigue, appetite changes, feelings of worthlessness, age]                                 |
| CN | [fatigue, appetite changes, concentration difficulty, sleep disturbance]                    |
| CN | [fatigue, appetite changes, sleep disturbance, MCP-1]                                       |
| CN | [fatigue, appetite changes, sleep disturbance, age]                                         |
| CN | [appetite changes, feelings of worthlessness, sleep disturbance, MCP-1]                     |
| CN | [appetite changes, feelings of worthlessness, age, IL-6]                                    |
| CF |                                                                                             |

|    |                                                                                                |
|----|------------------------------------------------------------------------------------------------|
| CF | [psychomotor problems, suicidal ideation, loss of interest, feelings of worthlessness]         |
| CF | [psychomotor problems, suicidal ideation, fatigue, MCP-1]                                      |
| CF | [psychomotor problems, suicidal ideation, appetite changes, MCP-1]                             |
| CF | [psychomotor problems, fatigue, loss of interest, BMI]                                         |
| CF | [psychomotor problems, fatigue, concentration difficulty, MCP-1]                               |
| CF | [psychomotor problems, appetite changes, loss of interest, feelings of worthlessness]          |
| CF | [psychomotor problems, appetite changes, loss of interest, age]                                |
| CF | [psychomotor problems, concentration difficulty, loss of interest, feelings of worthlessness]  |
| CF | [suicidal ideation, loss of interest, Feelings of sadness, fatigue]                            |
| CF | [suicidal ideation, loss of interest, Feelings of sadness, appetite changes]                   |
| CF | [suicidal ideation, feelings of worthlessness, sleep disturbance, age]                         |
| CF | [loss of interest, Feelings of sadness, fatigue, concentration difficulty]                     |
| CF | [loss of interest, fatigue, BMI, sleep disturbance]                                            |
| CF | [loss of interest, appetite changes, sleep disturbance, age]                                   |
| CF | [BMI, fatigue, age, TNF- $\alpha$ ]                                                            |
| CF | [fatigue, appetite changes, concentration difficulty, age]                                     |
| CF | [fatigue, sleep disturbance, feelings of worthlessness, MCP-1]                                 |
| CF | [appetite changes, concentration difficulty, sleep disturbance, age]                           |
| CF | [feelings of worthlessness, concentration difficulty, sleep disturbance, age]                  |
| CF | [IL-6, age, TNF- $\alpha$ , CRP]                                                               |
| C~ |                                                                                                |
| C~ | [psychomotor problems, fatigue, appetite changes, sleep disturbance]                           |
| C^ |                                                                                                |
| C^ | [psychomotor problems, suicidal ideation, loss of interest, concentration difficulty]          |
| C^ | [psychomotor problems, suicidal ideation, appetite changes, concentration difficulty]          |
| C^ | [psychomotor problems, suicidal ideation, feelings of worthlessness, concentration difficulty] |
| C^ | [psychomotor problems, fatigue, loss of interest, appetite changes]                            |
| C^ | [psychomotor problems, fatigue, appetite changes, concentration difficulty]                    |
| C^ | [psychomotor problems, fatigue, MCP-1, sleep disturbance]                                      |
| C^ | [psychomotor problems, appetite changes, loss of interest, concentration difficulty]           |
| C^ | [psychomotor problems, appetite changes, feelings of worthlessness, concentration difficulty]  |
| C^ | [psychomotor problems, appetite changes, feelings of worthlessness, sleep disturbance]         |
| C^ | [psychomotor problems, appetite changes, concentration difficulty, sleep disturbance]          |
| C^ | [psychomotor problems, appetite changes, MCP-1, sleep disturbance]                             |
| C^ | [suicidal ideation, loss of interest, appetite changes, concentration difficulty]              |
| C^ | [suicidal ideation, loss of interest, feelings of worthlessness, concentration difficulty]     |
| C^ | [suicidal ideation, feelings of worthlessness, appetite changes, concentration difficulty]     |
| C^ | [loss of interest, fatigue, appetite changes, concentration difficulty]                        |
| C^ | [loss of interest, fatigue, appetite changes, sleep disturbance]                               |
| C^ | [loss of interest, appetite changes, feelings of worthlessness, concentration difficulty]      |
| C^ | [BMI, IL-6, age, TNF- $\alpha$ ]                                                               |

|           |                                                                                            |
|-----------|--------------------------------------------------------------------------------------------|
| <b>C^</b> | [fatigue, appetite changes, feelings of worthlessness, sleep disturbance]                  |
| <b>C^</b> | [appetite changes, feelings of worthlessness, concentration difficulty, sleep disturbance] |
| <b>C^</b> | [appetite changes, feelings of worthlessness, concentration difficulty, age]               |
| <b>C^</b> | [appetite changes, feelings of worthlessness, sleep disturbance, age]                      |

*Note.* "CN," "C~," and "C^" patterns, which are labeled in **bold**, were determined as network motifs.
